# Supplementary material for: Quenching of fluorescently labeled pyrrolidinyl peptide nucleic acid by oligodeoxyguanosine and its application in DNA sensing
Source: Royal Society of Chemistry journal article supplement (doi:10.1039/d0ob01299h), 2020-01-01
Supplement: d0ob01299h1.pdf [file d0ob01299h1.pdf]

## Electronic Supplementary Information

### Quenching of fluorescently labeled pyrrolidinyl peptide nucleic acid by oligodeoxyguanosine and its application in DNA sensing

Chayan Charoenpakdee and Tirayut Vilaivan\*

Organic Synthesis Research Unit, Department of Chemistry, Faculty of Science,  
Chulalongkorn University, Phayathai Road, Patumwan, Bangkok 10330, Thailand.

\*E-mail: vtirayut@chula.ac.th

| Entry      | Caption                                                                                                                                                        | Page |
|------------|----------------------------------------------------------------------------------------------------------------------------------------------------------------|------|
| Table S1   | Sequence, isolated yield, and characterization data of PNA in this study                                                                                       | 2    |
| Table S2   | Melting temperatures of PNA-DNA hybrids                                                                                                                        | 2    |
| Figure S1  | Analytical HPLC chromatogram and MALDI-TOF mass spectrum of FluK1                                                                                              | 3    |
| Figure S2  | Analytical HPLC chromatogram and MALDI-TOF mass spectrum of FluK5                                                                                              | 4    |
| Figure S3  | Analytical HPLC chromatogram and MALDI-TOF mass spectrum of PNA1                                                                                               | 5    |
| Figure S4  | Analytical HPLC chromatogram and MALDI-TOF mass spectrum of PNA2                                                                                               | 6    |
| Figure S5  | Analytical HPLC chromatogram and MALDI-TOF mass spectrum of PNA3                                                                                               | 7    |
| Figure S6  | Analytical HPLC chromatogram and MALDI-TOF mass spectrum of TMRK4                                                                                              | 8    |
| Figure S7  | UV-visible spectra of FluK5 and its complexes with A) complementary DNA oligonucleotides bearing various 3' overhangs and B) homo-oligodeoxynucleotides        | 9    |
| Figure S8  | UV-visible spectra of FluK1 and FluK5 probes in comparison with free fluorescein and fluorescein-labeled DNA probe in the absence and presence of dG10         | 10   |
| Figure S9  | CD spectra of FluK5 and its complementary DNA oligonucleotides bearing various 3' overhangs A) before and B) after mixing                                      | 11   |
| Figure S10 | CD spectra of FluK5 and homo-oligodeoxynucleotides A) before and B) after mixing                                                                               | 12   |
| Figure S11 | CD spectra of various G-quadruplex-forming DNA sequences                                                                                                       | 13   |
| Figure S12 | Gel electrophoresis experiments A) visualized under transilluminator (365 nm) B) visualized by UV shadowing (256 nm) over a silica gel GF254-coated TLC plate  | 13   |
| Figure S13 | Brightness percentage of FluK5 PNA probe-dG10 complex at 525 nm in the presence of various quantities of complementary (dCs) and non-complementary DNA targets | 14   |
| Figure S14 | Brightness percentage of PNA-DNA hybrids deriving from fluorescein- and TMR-labeled PNA probes                                                                 | 14   |
| Figure S15 | Raw fluorescence spectra of fluorescein- and TMR-labeled PNA probes and their DNA hybrids                                                                      | 15   |

**Table S1.** Sequence, isolated yield and characterization data of PNA in this study

| PNA   | Sequence (N→C)          | Isolated yield (%) <sup>a</sup> | <i>m/z</i> calcd | <i>m/z</i> found |
|-------|-------------------------|---------------------------------|------------------|------------------|
| FluK1 | Flu-GTAGATCACT-K        | 25                              | 3875.10          | 3879.48          |
| FluK5 | Flu-GTAGATCACT-KKKKK    | 30                              | 4387.79          | 4385.69          |
| PNA1  | Flu-GCTTTTTTACA-KKKKK   | 21                              | 4686.12          | 4685.36          |
| PNA2  | Flu-AGTCTGATAAGC-KKKKK  | 17                              | 5086.53          | 5085.49          |
| PNA3  | Flu-TTAATACCTTTGCTC-KKK | 23                              | 5738.22          | 5737.36          |
| TMRK4 | TMR-CTAAATTCAGA-KKKK    | 18                              | 4640.13          | 4637.77          |

<sup>a</sup> Isolated yield after HPLC purification, spectrophotometrically determined

**Table S2.** Melting temperatures of PNA-DNA hybrids. Conditions: [PNA] = 1 μM, [DNA] = 1.2 μM in 10 mM phosphate buffer pH 7.0. The probe binding region in the DNA targets is underlined.

| PNA   | DNA      | Sequence (N→C)                                 | <i>T<sub>m</sub></i> (°C) |
|-------|----------|------------------------------------------------|---------------------------|
| FluK1 |          | Flu-GTAGATCACT-K                               |                           |
|       | dCs/dFK5 | 3'- <u>CATCTAGTGA</u> -5'                      | 47.6                      |
| FluK5 |          | Flu-GTAGATCACT-KKKKK                           |                           |
|       | dCs/dFK5 | 3'- <u>CATCTAGTGA</u> -5'                      | 71.3                      |
|       | dMs      | 3'- <u>CATCTCGTGA</u> -5'                      | 39.7                      |
|       | dCL      | 3'-GGTCCCGTACC <u>ATCTAGTGACATGCGGCCGC</u> -5' | 82.5                      |
|       | dML      | 3'-GGTCCCGTACC <u>ATCTCGTGACATGCGGCCGC</u> -5' | 59.2                      |
| PNA1  |          | Flu-GCTTTTTTACA-KKKKK                          |                           |
|       | DNA1     | 3'- <u>CGAAAAAATGT</u> -5'                     | 74.1                      |
| PNA2  |          | Flu-AGTCTGATAAGC-KKKKK                         |                           |
|       | DNA2     | 3'-AGTTGTAGT <u>CAGACTATTCGAT</u> -5'          | 76.7                      |
| PNA3  |          | Flu-TTAATACCTTTGCTC-KKK                        |                           |
|       | DNA3     | 3'- <u>AATTATGGAAACGAG</u> -5'                 | >95                       |
| TMRK4 |          | TMR-CTAAATTCAGA-KKKK                           |                           |
|       | dTK4     | 3'- <u>AATTTAAGTCT</u> -5'                     | 84.5                      |

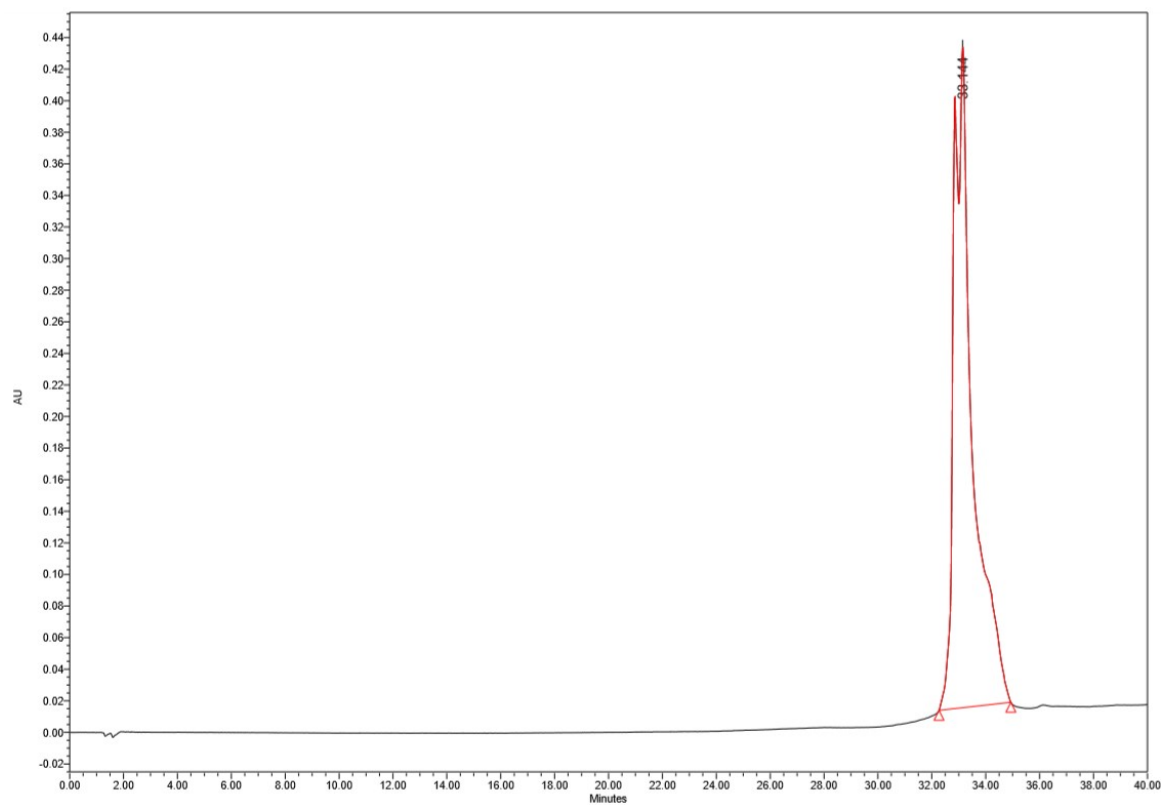

A

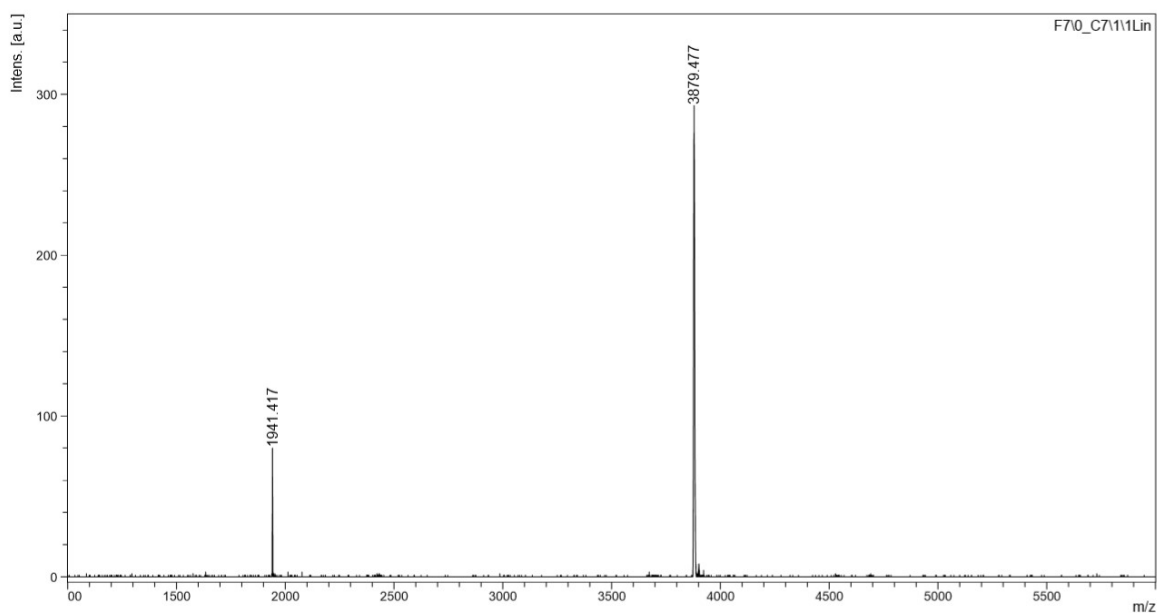

B

**Figure S1.** A) Analytical HPLC chromatogram and B) MALDI-TOF mass spectrum of FluK1 (calcd for  $[M \cdot H]^+ = 3875.10$ ). The two peaks in the HPLC chromatogram are attributed to the presence of two isomers (5- and 6-) of the carboxyfluorescein label.

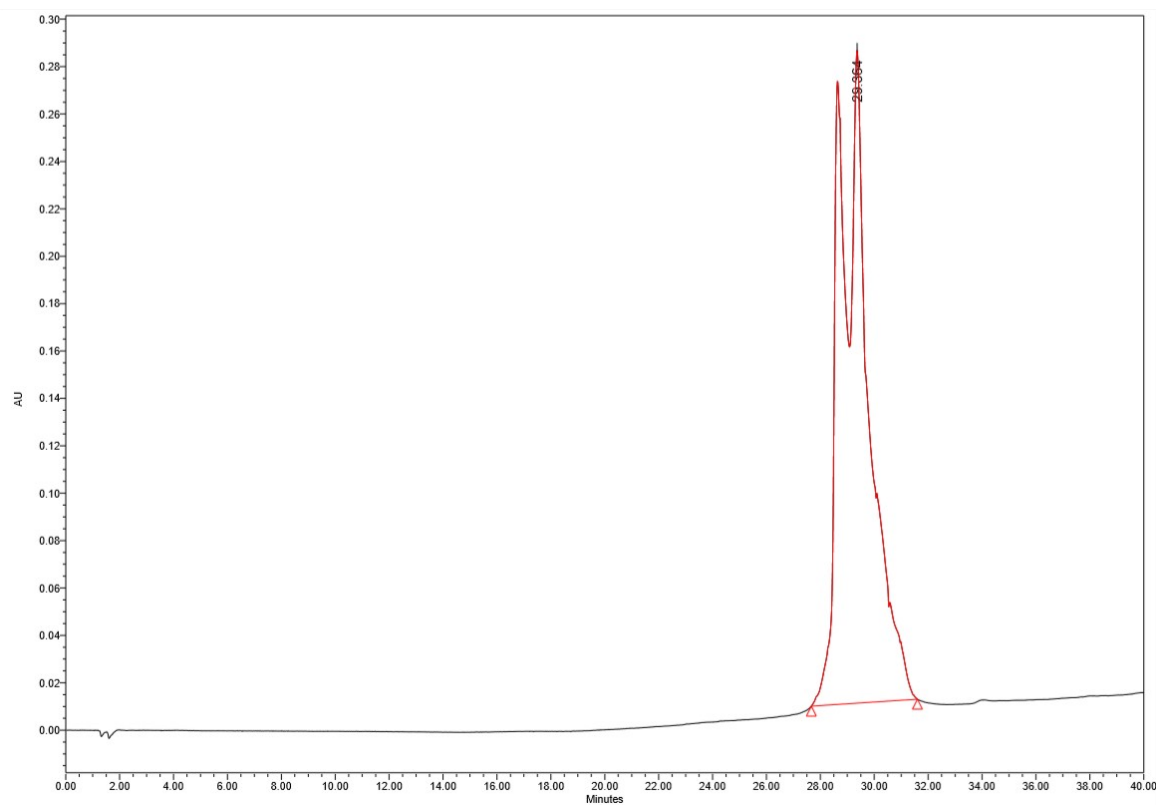

A

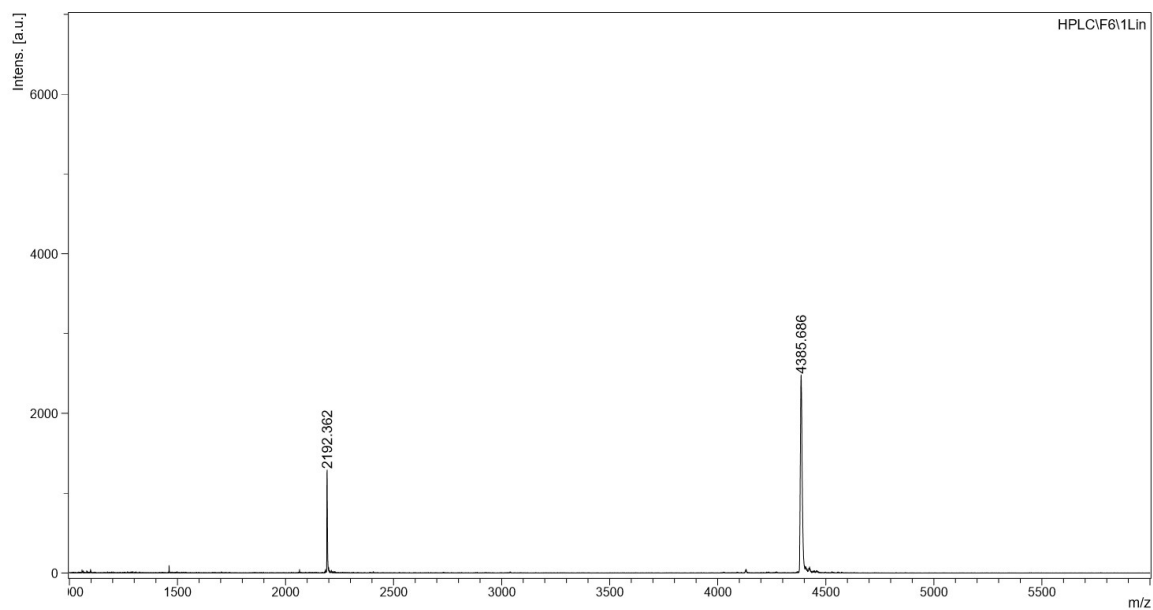

B

**Figure S2.** A) Analytical HPLC chromatogram and B) MALDI-TOF mass spectrum of FluK5 (calcd for  $[M \cdot H]^+ = 4387.79$ ). The two peaks in the HPLC chromatogram are attributed to the presence of two isomers (5- and 6-) of the carboxyfluorescein label.

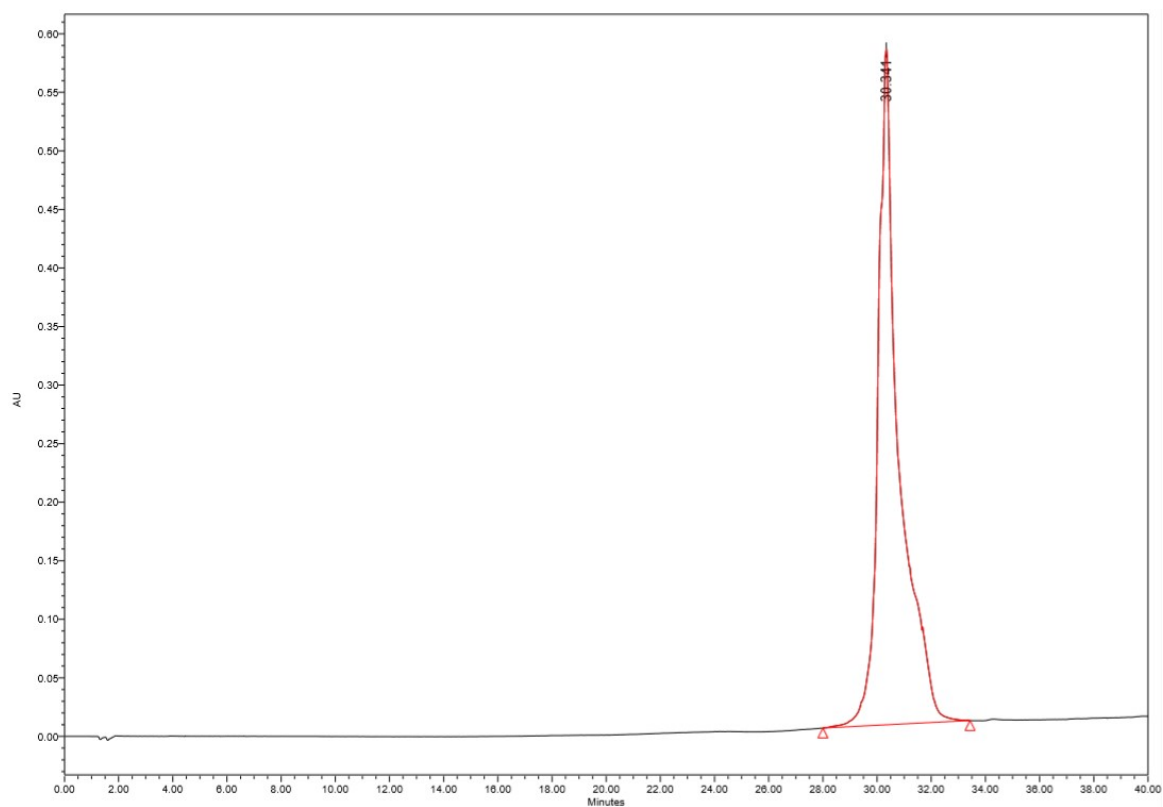

A

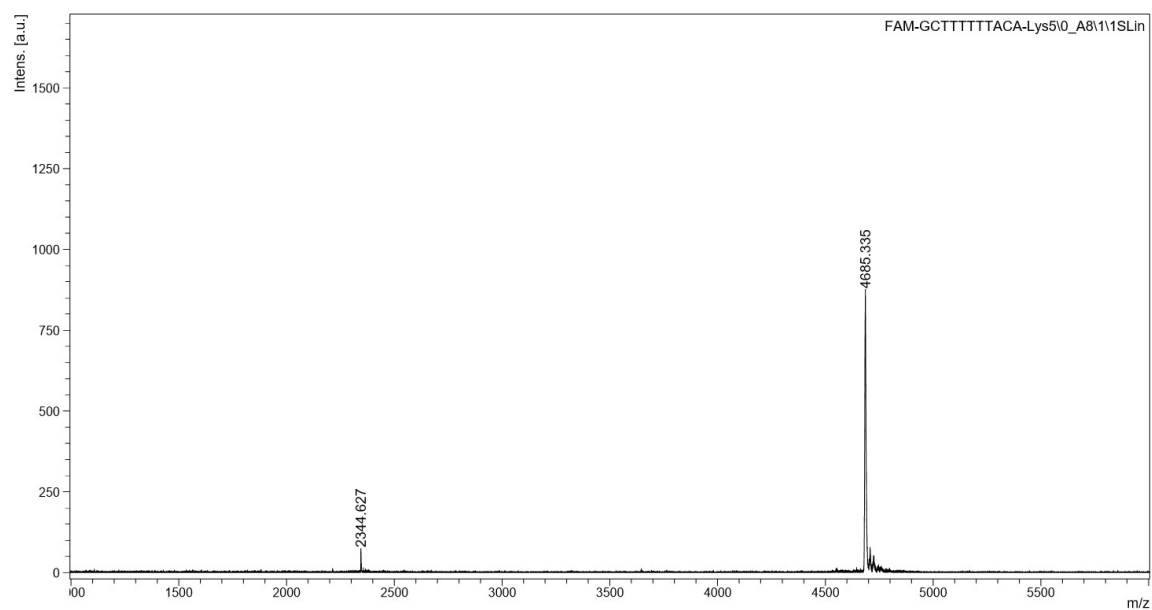

B

**Figure S3.** A) Analytical HPLC chromatogram and B) MALDI-TOF mass spectrum of PNA1 (calcd for  $[M \cdot H]^+ = 4686.12$ )

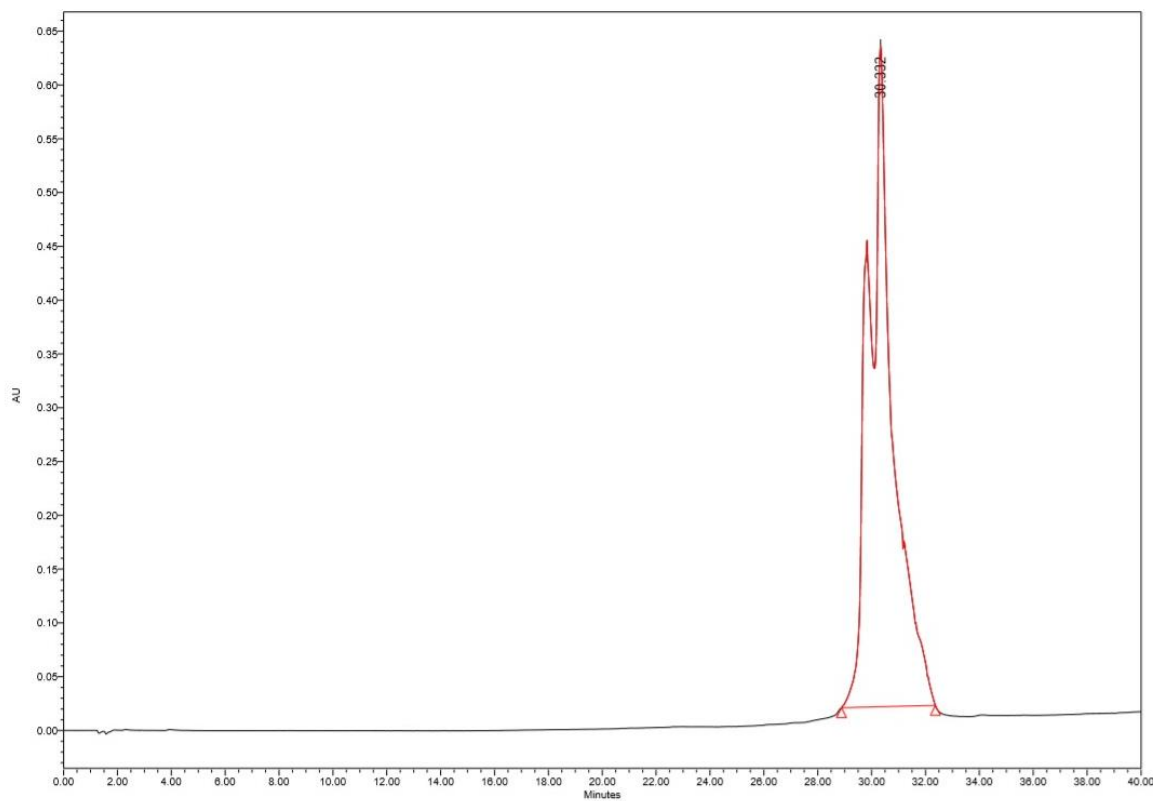

A

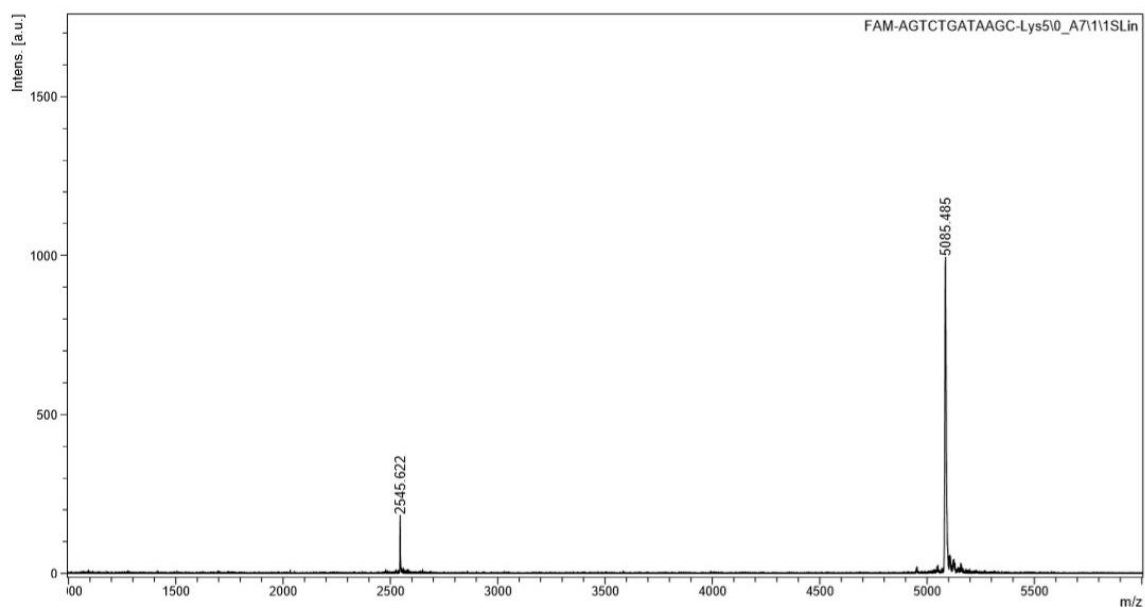

B

**Figure S4.** A) Analytical HPLC chromatogram and B) MALDI-TOF mass spectrum of PNA2 (calcd for  $[M \cdot H]^+ = 5086.53$ ). The two peaks in the HPLC chromatogram are attributed to the presence of two isomers (5- and 6-) of the carboxyfluorescein label.

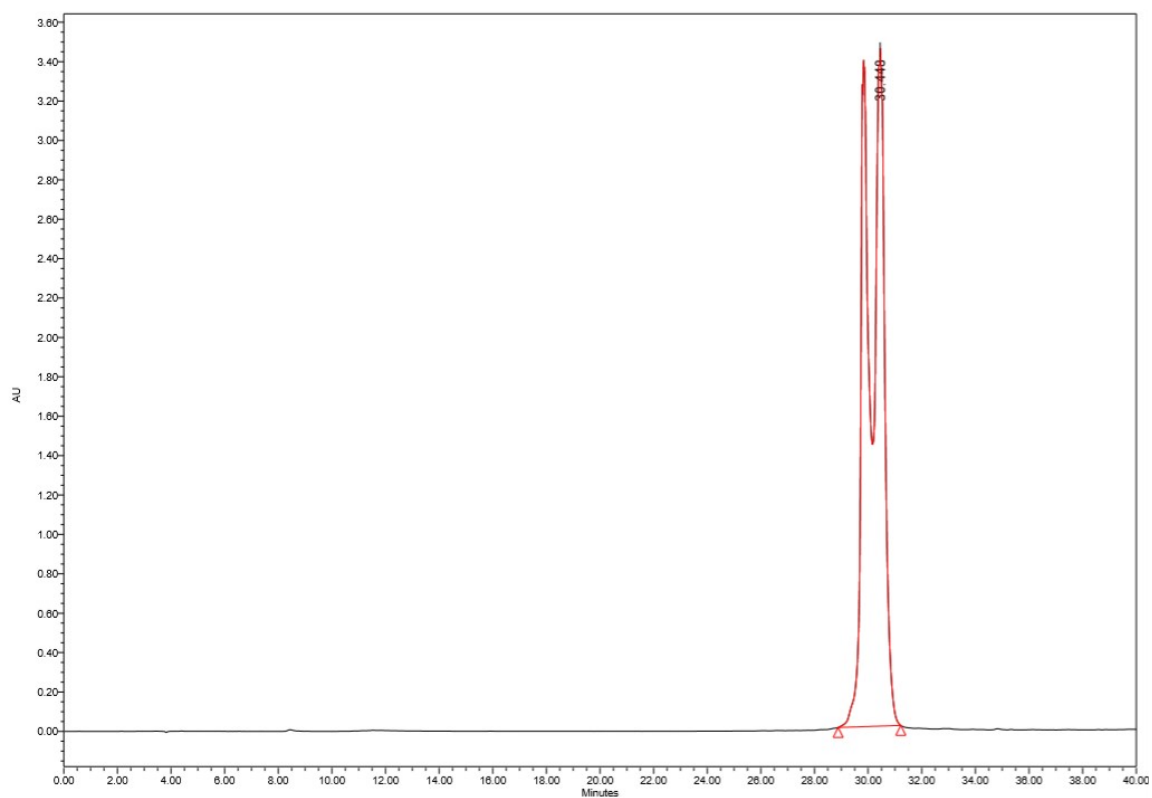

A

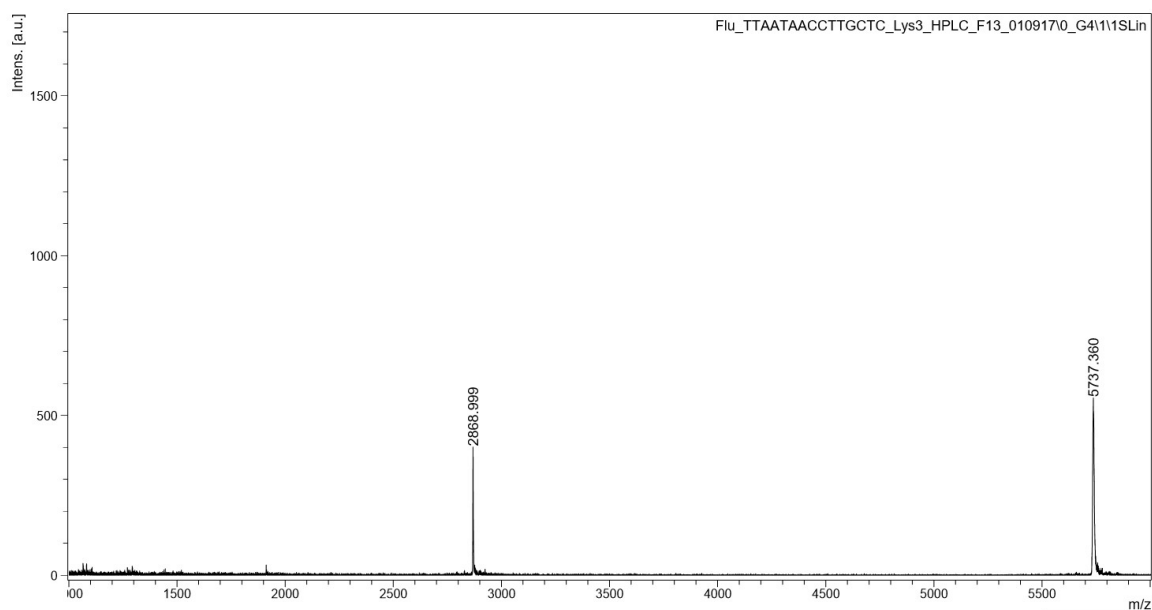

B

**Figure S5.** A) Analytical HPLC chromatogram and B) MALDI-TOF mass spectrum of PNA3 (calcd for  $[M \cdot H]^+ = 5738.18$ ). The two peaks in the HPLC chromatogram are attributed to the presence of two isomers (5- and 6-) of the carboxyfluorescein label.

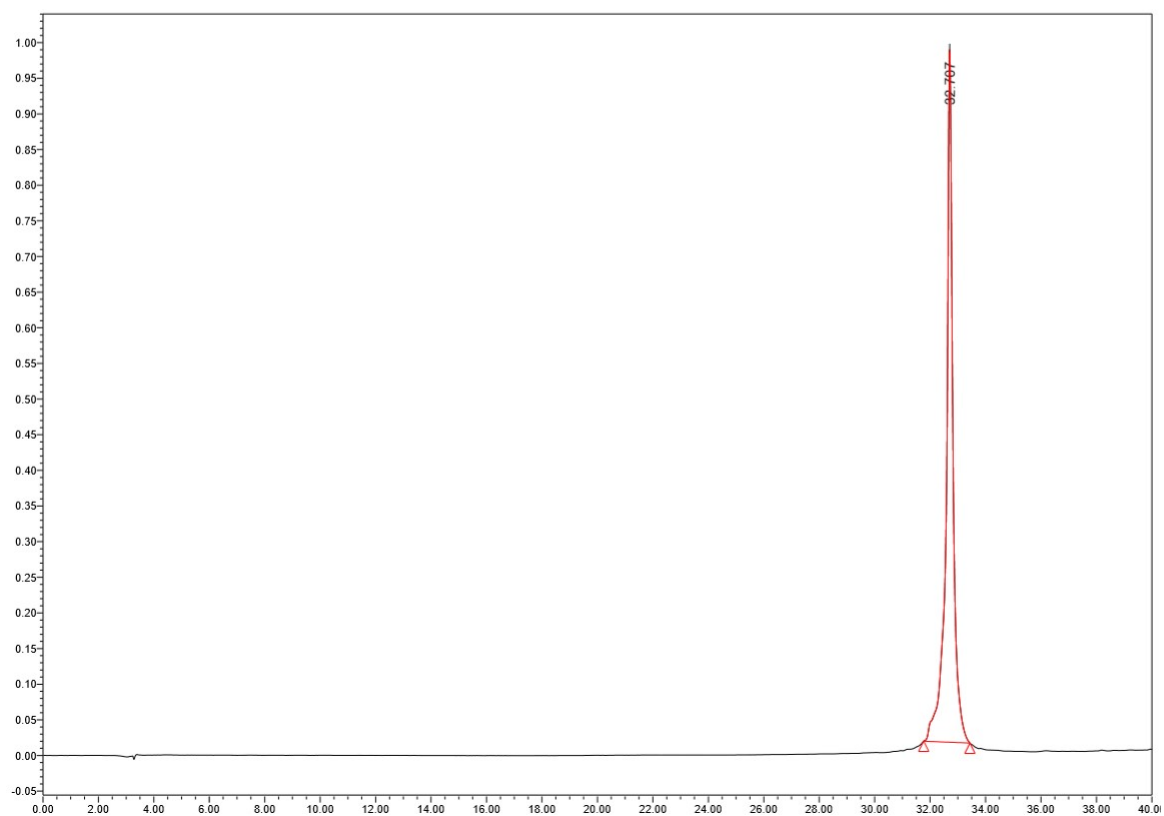

A

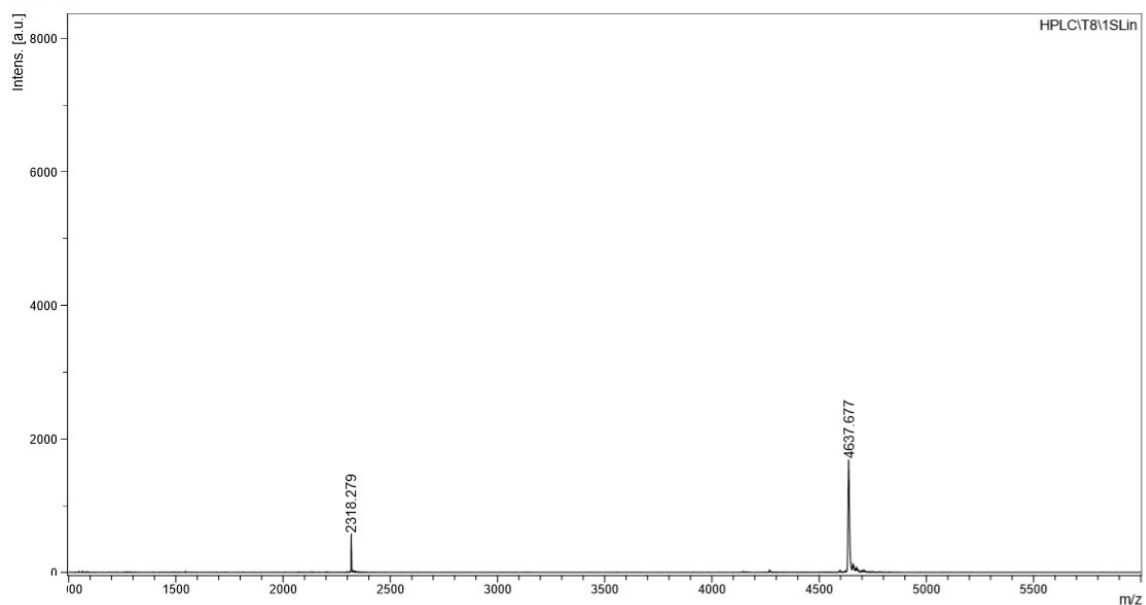

B

**Figure S6.** A) Analytical HPLC chromatogram and B) MALDI-TOF mass spectrum of TMRK4 (calcd for  $[M \cdot H]^+ = 4640.13$ )



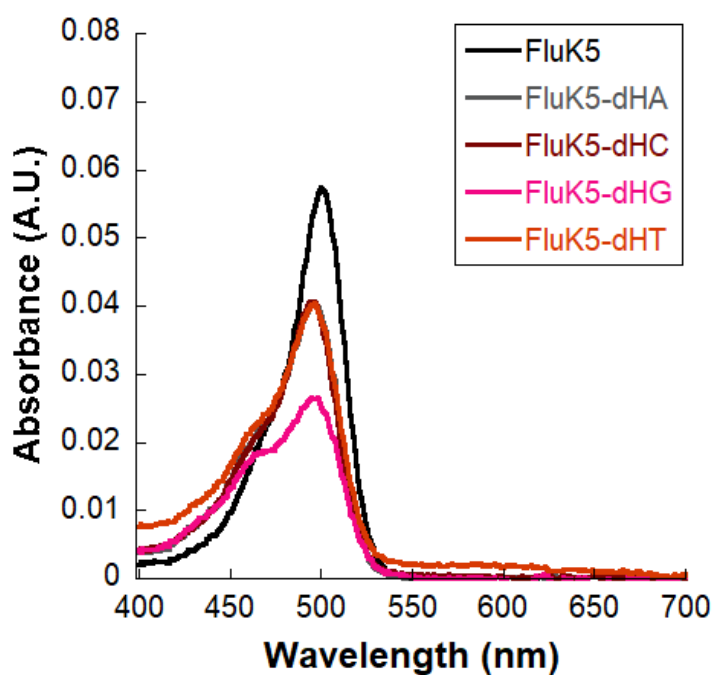

A

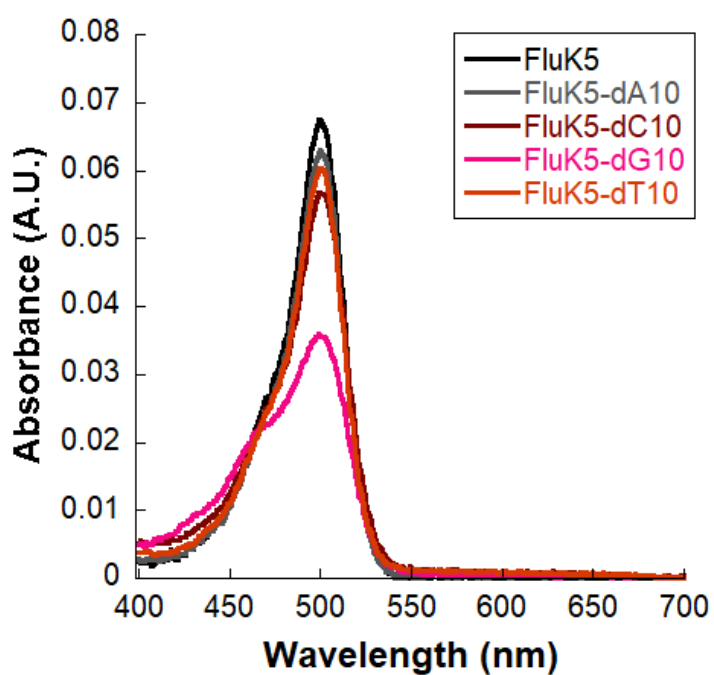

B

**Figure S7.** UV-visible spectra of FluK5 and its complexes with A) complementary DNA oligonucleotides bearing various 3' overhangs and B) homo-oligodeoxynucleotides. Conditions: [FluK5] = 1.0  $\mu$ M, [DNA] = 1.2  $\mu$ M in 10 mM sodium phosphate buffer pH 7.0.

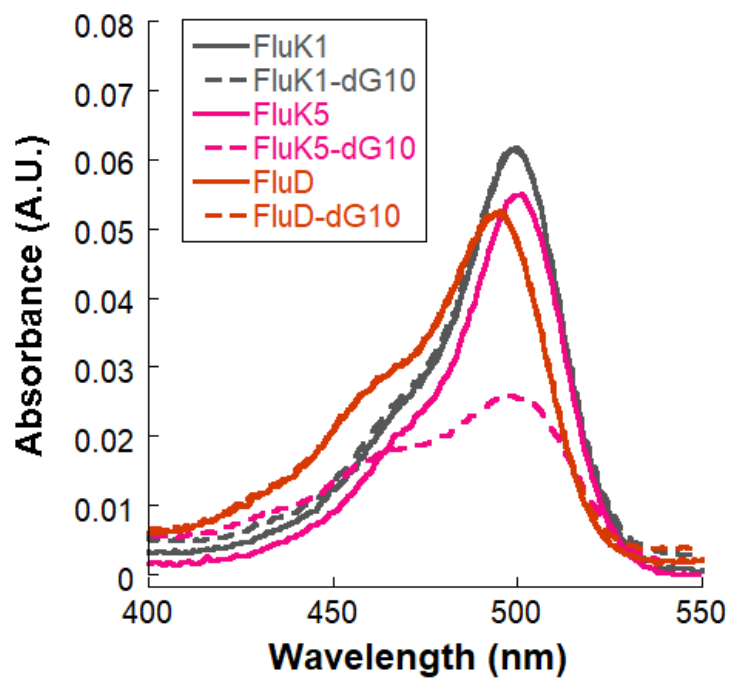

**Figure S8.** UV-visible spectra of FluK1 and FluK5 probes in comparison with free fluorescein and fluorescein-labeled DNA probe in the absence and presence of dG10. Conditions: [Probe] = 1.0  $\mu\text{M}$ , [DNA] = 1.2  $\mu\text{M}$  in 10 mM sodium phosphate buffer pH 7.0.

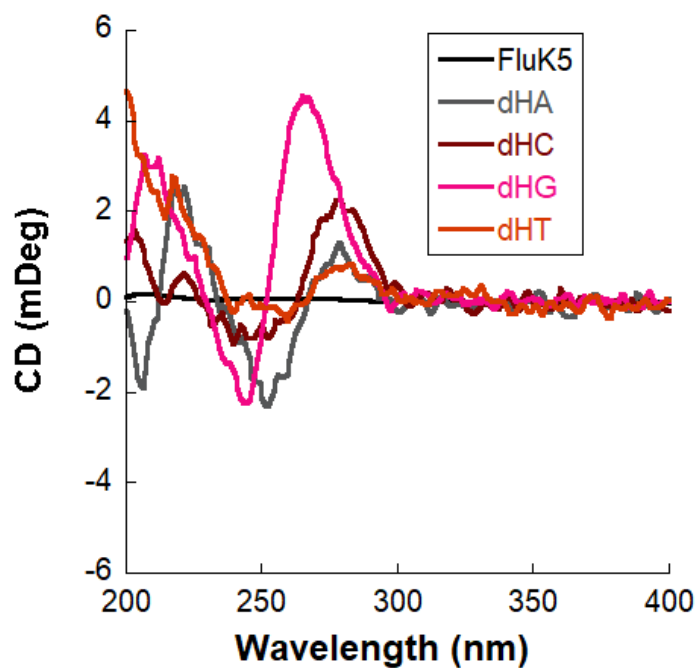

A

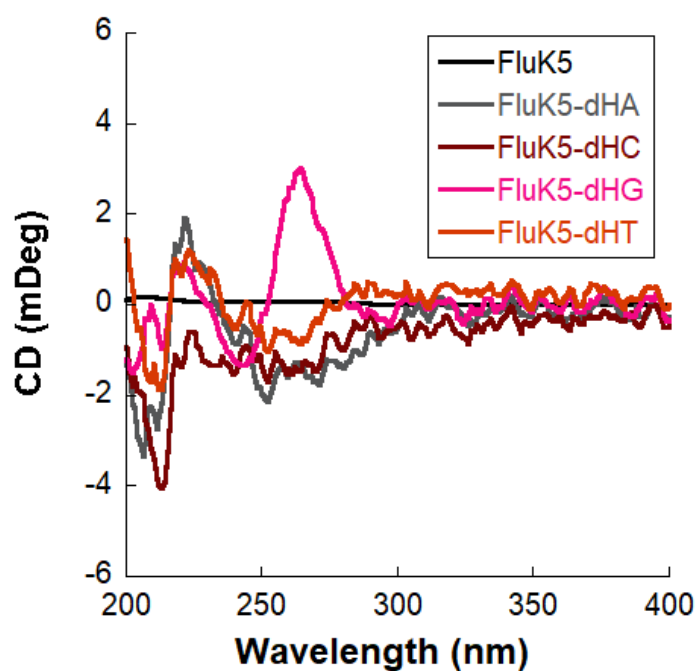

B

**Figure S9.** CD spectra of FluK5 and its complementary DNA oligonucleotides bearing various 3' overhangs A) before and B) after mixing. Conditions: [FluK5] = 1.0  $\mu$ M, [DNA] = 1.2  $\mu$ M in 10 mM sodium phosphate buffer pH 7.0.

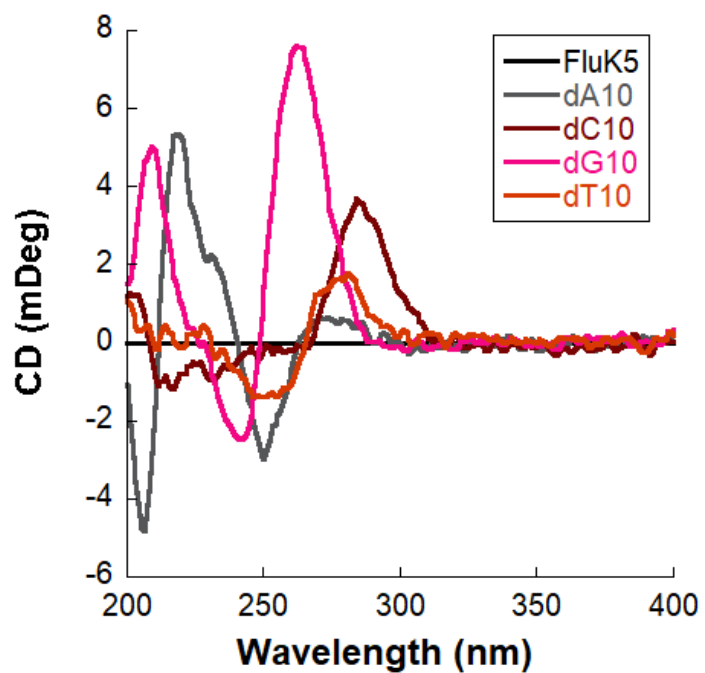

A

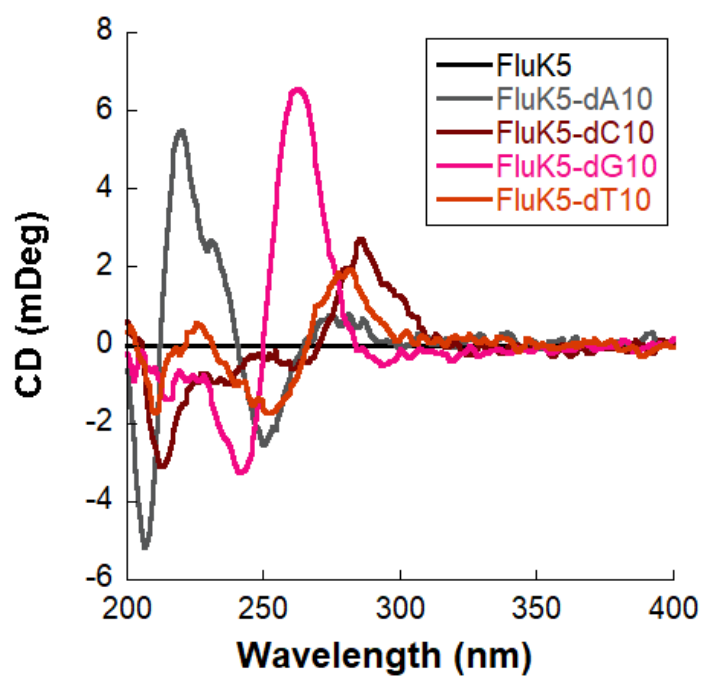

B

**Figure S10.** CD spectra of FluK5 and homo-oligodeoxynucleotides A) before and B) after mixing. Conditions: [FluK5] = 1.0  $\mu$ M, [DNA] = 1.2  $\mu$ M in 10 mM sodium phosphate buffer pH 7.0.

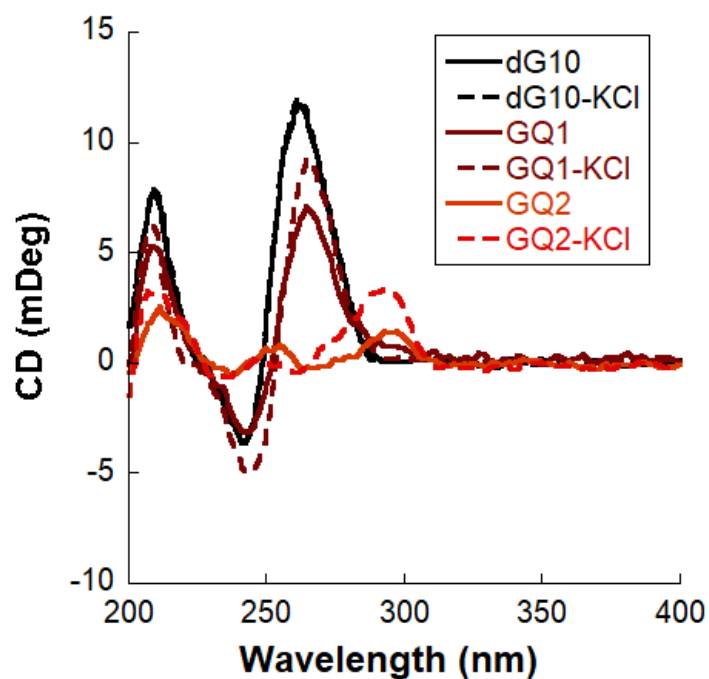

**Figure S11.** CD spectra of various G-quadruplex-forming DNA sequences. Conditions: [DNA] = 1.2  $\mu$ M, [KCl] = 0 or 10 mM in 10 mM sodium phosphate buffer pH 7.0.

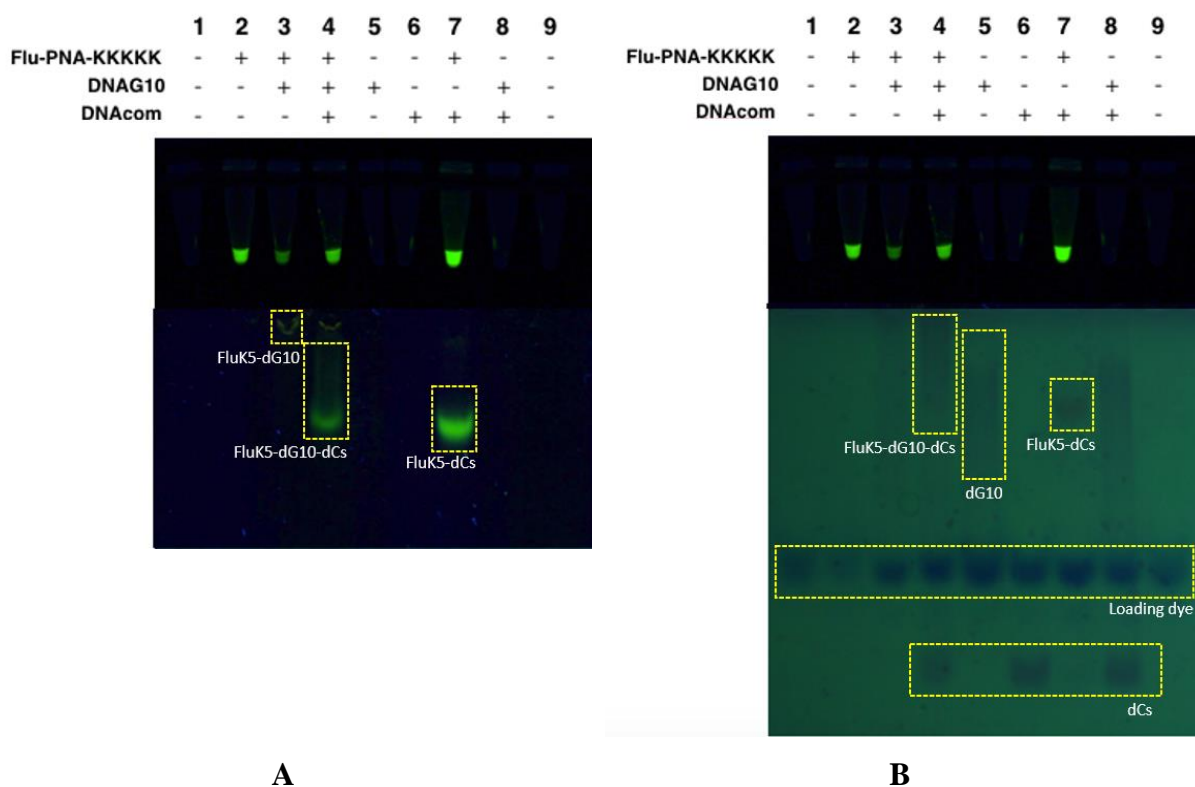

**Figure S12.** Gel electrophoresis experiments A) visualized under transilluminator (365 nm) B) visualized by UV shadowing (256 nm) over a silica gel GF254-coated TLC plate. The amounts of PNA and DNA (dCs/dG10) in each lane are 0.5 and 0.6 nmol, respectively.

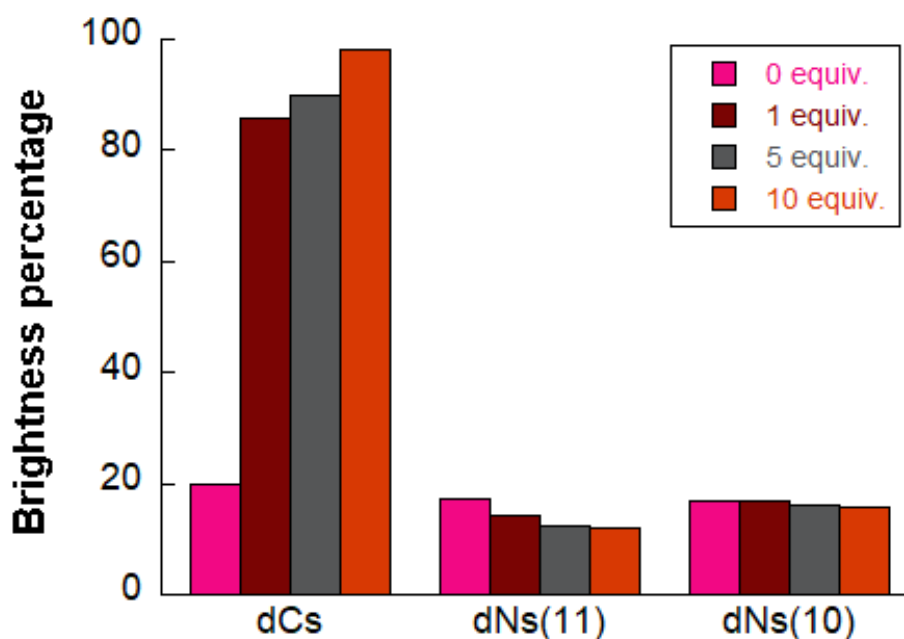

**Figure S13.** Brightness percentage of FluK5-dG10 complex at 525 nm in the presence of various quantities of complementary (dCs) and non-complementary DNA targets dNs(11): 5'-TCTGAATTTAA-3' and dNs(10): 5'-GTAGATCACT-3'. Conditions: [FluK5] = [dG10] = 0.1  $\mu$ M, [DNA] = 0.1 – 1.0  $\mu$ M in 10 mM sodium phosphate buffer pH 7.0.

\*Brightness percentage =  $(F_{\text{probe+dG10+DNA}})/F_{\text{probe}} * 100$

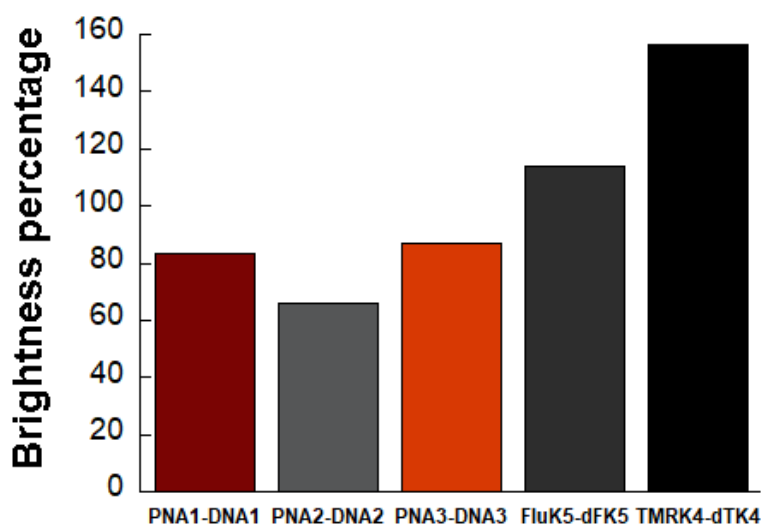

**Figure S14.** Brightness percentage of PNA-DNA duplexes of Flu-labeled PNA probes (PNA1, PNA2, PNA3, and FluK5) ( $\lambda_{\text{ex}}$  490 nm,  $\lambda_{\text{em}}$  525 nm) and a TMR-labeled PNA probe (TMRK4) ( $\lambda_{\text{ex}}$  520 nm,  $\lambda_{\text{em}}$  555 nm). Conditions: [PNA] = 0.1  $\mu$ M, [DNA] = 0.12  $\mu$ M in 10 mM sodium phosphate buffer pH 7.0.

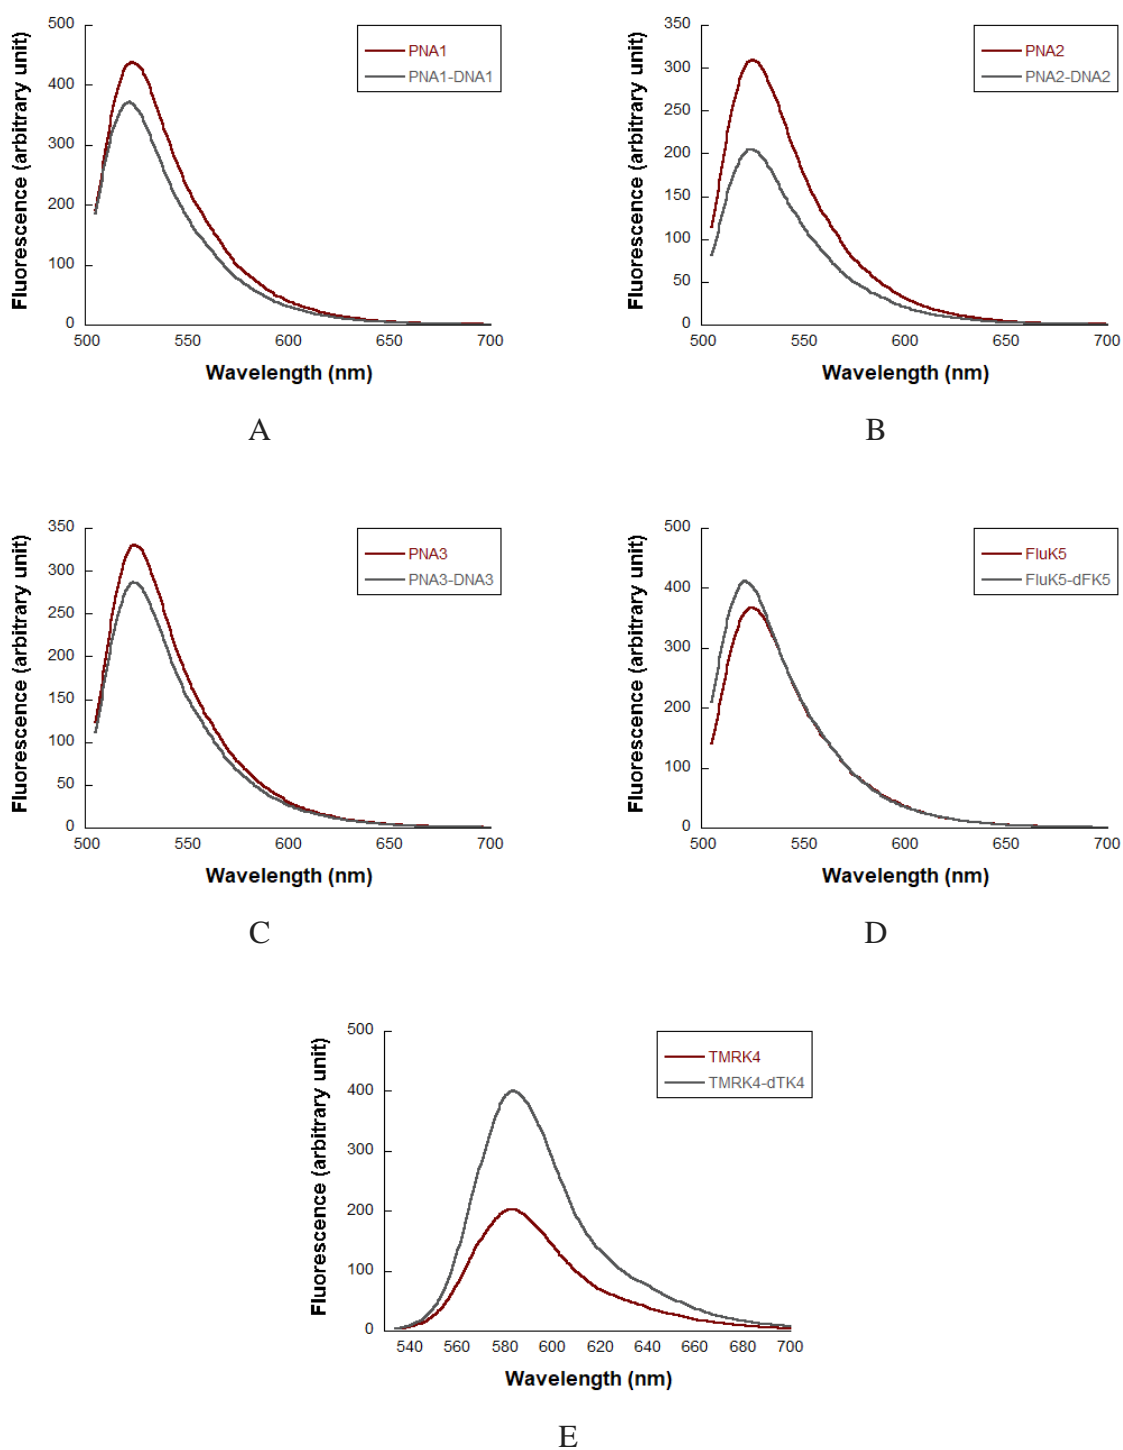

**Figure S15.** Raw fluorescence spectra of fluorescein-labeled PNA probes (A: PNA1, B: PNA2, C: PNA3, and D: FluK5) ( $\lambda_{\text{ex}}$  490 nm,  $\lambda_{\text{em}}$  525 nm) and a TMR-labeled PNA probe (E: TMRK4) ( $\lambda_{\text{ex}}$  520 nm,  $\lambda_{\text{em}}$  555 nm) and their DNA hybrids. Conditions: [PNA] = 0.1  $\mu\text{M}$ , [DNA] = 0.12  $\mu\text{M}$  in 10 mM sodium phosphate buffer pH 7.0.
